# Supplementary material
Source: publisher figshare collection journal article supplement (https://karger.figshare.com/ndownloader/files/14629871)
Supplement: Supplementary file 1 [file 14629871]

**MMC - Urinary and Fecal Continence Evaluation.**  
**(Apply questionnaire in parentes of patients aged 5 years or more).**

Questionnaire

1- IDENTIFICATION

1. Name

2- UTI

2.1. Has your child ever presented UTI?

- No.
- Yes, without fever.
- Yes, with fever.

2.2. If the anterior answer was YES, how many UTI episodes?

2.3. If the first answer was YES, was hospitalization required?

- Yes.
- No.

3- BLADDER CATHETERIZATION

3.1. Does patient perform clean intermittent catheterization (CIC)?

- Yes.
- No.

3.2. If the anterior answer was YES, how many times a day?

3.3. Already had urologic surgery?

- No.
- Yes.

3.4. If the anterior answer was YES, which surgery?

4- URINARY CONTINENCE

4.1. Does patient have urine leakage?

- No.
- Yes. Small amount, dropping or wetting clothes.
- Yes. Moderate or big amount, wetting diapers or clothes.

4.2. If the anterior answer was YES, does patient need a diaper?

- No.
- Yes.

4.3. If the anterior answer was YES, how many diapers a day?

4.4. If patient has urinary leakage even with CIC, in which situation do urinary loss occur?

- a. Any time between CIC.
- b. Next the subsequent CIC.

## 5- FAECAL CONTINENCE

5.1. What is the patient's bowel frequency (how many times a day)?

5.2. How would you classify patient's stool, most of the time, according to the table?  
Bristol Scale.

|                                                                                                                                                                |                                                            |
|----------------------------------------------------------------------------------------------------------------------------------------------------------------|------------------------------------------------------------|
| <b>TIPO 1</b><br>Caroços duros separados, como nozes.                         | <b>1 – Pedacos separados, duros como amendoim</b>          |
| <b>TIPO 2</b><br>Na forma de salsicha mas com caroços.                        | <b>2 – Forma de salsicha, mas segmentada</b>               |
| <b>TIPO 3</b><br>Na forma de salsicha ou cobra mas com rachas na superfície.  | <b>3 - Forma de salsicha, mas com fendas na superfície</b> |
| <b>TIPO 4</b><br>Como uma salsicha ou cobra, regular e macio.                 | <b>4 – Forma de salsicha ou cobra, lisa e mole</b>         |
| <b>TIPO 5</b><br>Caroços macios com cantos bem demarcados.                    | <b>5 – Pedacos moles, mas com contorno nítidos</b>         |
| <b>TIPO 6</b><br>Caroços macios com cantos rasgados.                          | <b>6 – Pedacos aerados, contornos esgarçados</b>           |
| <b>TIPO 7</b><br>Totalmente líquido.                                          | <b>7 – Aquosa, sem peças sólidas</b>                       |

5.3. Does the patient have diarrhea? How often?

- No.
- Yes, once a month.
- Yes, once a week.
- Yes, more than a time per week.

5.4. Has patient ever had enema due to constipation? If so, how often?

- No, never needed a enema.
- Yes, sporadic.
- Yes, once a month.
- Yes, weekly.

5.5. Does patient have fecal loss?

- No.
- Yes.

5.6. Does patient use any drug to aid evacuate?

- No.
- Yes, oral laxative.
- Yes, PEG 4000.
- Yes, enema.
- Yes, with peristeen (transanal colonic irrigation) or similar.

5.7. If the anterior answer was YES, what is the medication?

5.8. If the answer in question 5.5 was YES, how many times a day does it take to change diapers or clothes?

## 6- SELF ESTIMATION AND INDEPENDENCE\*

6.1. Did you feel embarrassed about how you look?

- Never.

- Almost never.
- Sometimes.
- Almost always.
- Always.

6.2. Did dealing with health problems upset you?

- Never.
- Almost never.
- Sometimes.
- Almost always.
- Always.
- I did not have health problems.

6.3. Did it bother you to catheterize to get urine out?

- Never.
- Almost never.
- Sometimes.
- Almost always.
- Always.
- I did not catheterize.

6.4. Did it bother you if people in your family needed to help you?

- Never.
- Almost never.
- Sometimes.
- Almost always.
- Always.
- I did not need help.

6.5. Did it bother you if your friends or people outside your family needed to help you?

- Never.
- Almost never.
- Sometimes.
- Almost always.
- Always.
- I did not need help.

## 7 - BLADDER AND BOWEL\*

7.1. Did your urine problems make you feel sad or worried?

- Never.
- Almost never.
- Sometimes.
- Almost always.
- Always.
- I did not have urine problems.

7.2. Did your urine problems stop you from doing fun things?

- Never.
- Almost never.
- Sometimes.
- Almost always.
- Always.
- I did not have urine problems.

7.3. Did leaking stool/ poop bother you?

- Never.
- Almost never.
- Sometimes.
- Almost always.
- Always.
- I did not leak.

7.4. Did your bowel/ poop problems stop you doing fun things?

- Never.
- Almost never.
- Sometimes.
- Almost always.
- Always.
- I did not have bowel/ poop problems.

7.5. Did it bother you to wait for stool/ poop to come out?

- Never.
- Almost never.
- Sometimes.
- Almost always.
- Always.
- I did not have to wait.

\*The questions were taken from the QUALAS-C (Quality of Life Assessment in Spina bifida for Children).

Szymanski K.M., Misseri R., Whittam B, Yang D.Y., Raposo S, King S.J., Kaefer M., Rink R.C., Cain M.P: Quality of Life Assessment in Spina Bifida for Children (QUALAS-C): Development and Validation of a Novel Health-related Quality of Life Instrument. Urology, 2016, 87: 178-84.
